# Supplementary material for: Mutual Exclusion of Methanobrevibacter Species in the Human Gut Microbiota Facilitates Directed Cultivation of a Candidatus Methanobrevibacter Intestini Representative
Source: PubMed Central journal article supplement (PMC9431525; doi:10.1128/spectrum.00849-22), 2022-06-14
Supplement: spectrum.00849-22-s0001.pdf [file spectrum.00849-22-s0001.pdf]

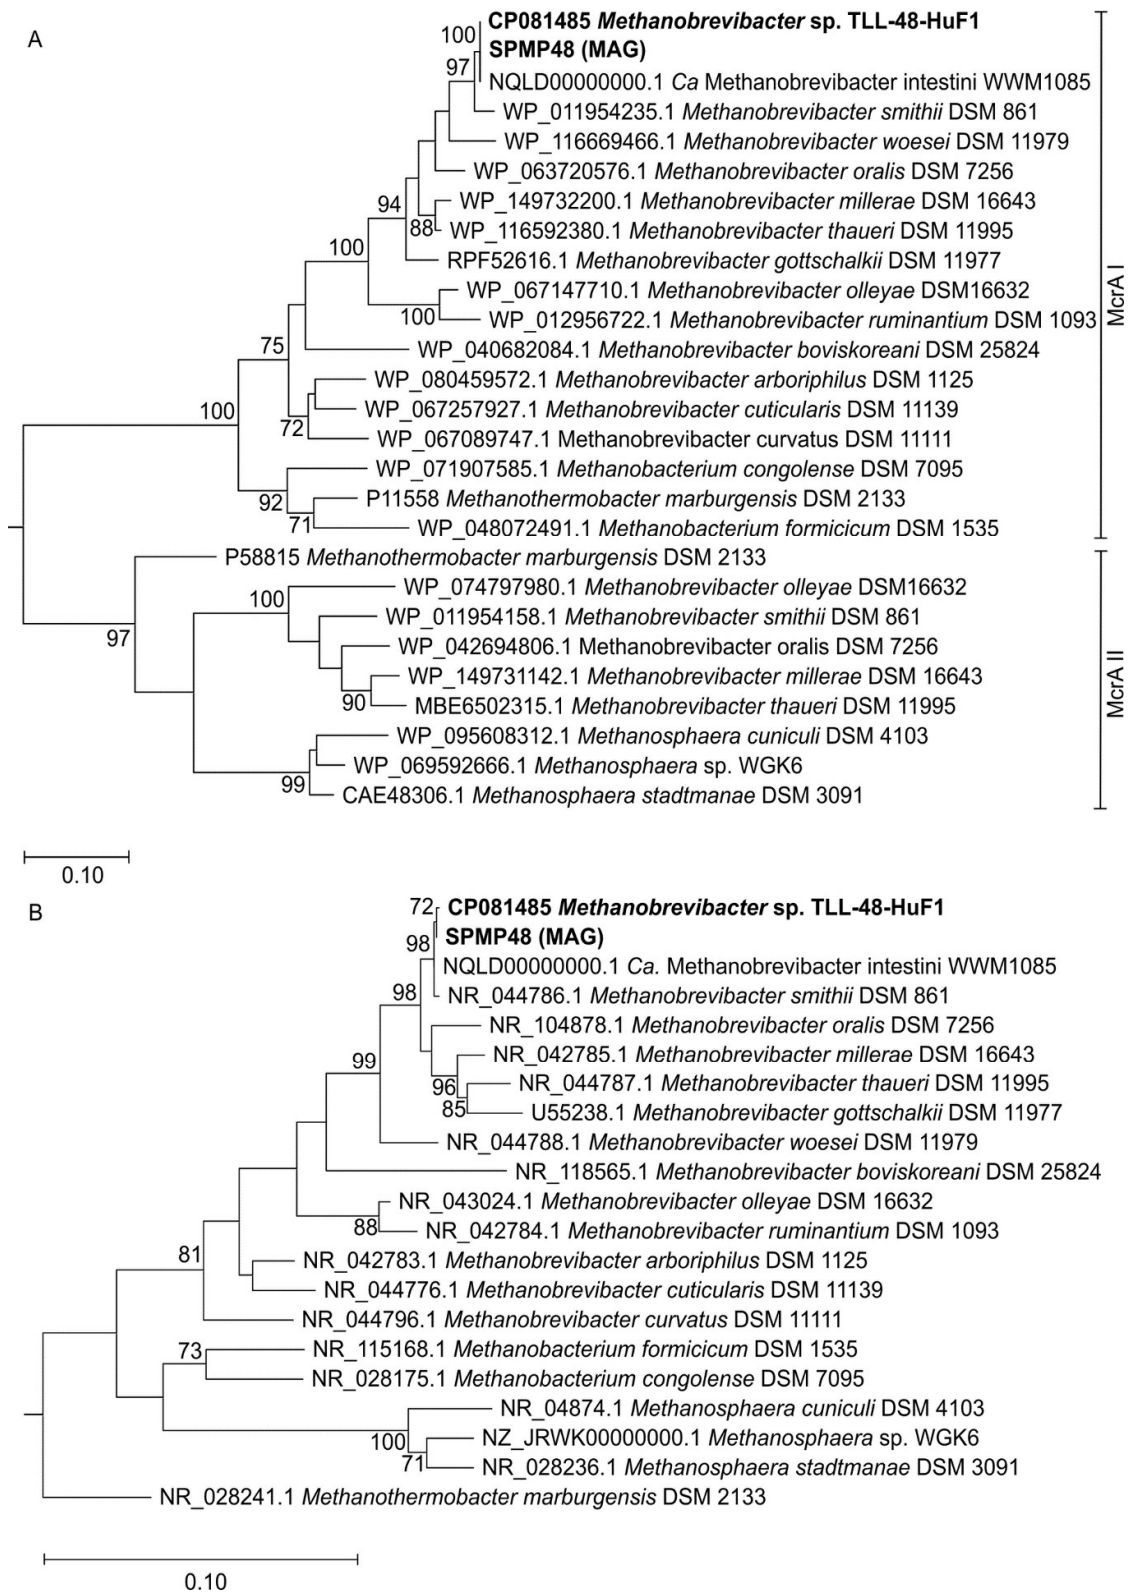

**FIG S1** Phylogenetic trees comparing strain TLL-48-HuF1 to *Methanobrevibacter* type strains and *Candidatus* *Methanobrevibacter intestini* representative strain WWM1085. (A) A maximum

likelihood phylogenetic tree of McrA protein sequences of type strains of the Methanobacteriales order including *Methanobrevibacter smithii* WWM1085 of a human fecal isolate and *Methanosphaera* sp. WGK6 a gut isolate of a Western grey kangaroo. Some strains harbor the methyl-coenzyme M reductase isoenzyme, which forms a clade denoted by McrA II. McrA of Candidatus Bathyarchaeota archaeon BA1 (KPV65186.1) and Candidatus Bathyarchaeota archaeon BA2 (KPV61791.1) were used as outgroups and not shown. (B) A maximum likelihood phylogenetic tree of 16S rRNA genes of the same strains as the McrA tree with exception to *Saccharolobus solfataricus* strain DSM 1616 (NR\_119198.1) as an outgroup. NCBI (GenBank/RefSeq) accession numbers come afore taxonomic nomenclatures. Sequences from this study are highlighted in bold. Bootstrap values for both trees were generated using 1,000 iterations. Only bootstrap values above 70% are shown. Scale bar for branch length indicate 0.10 average nucleotide or amino acid change per position.

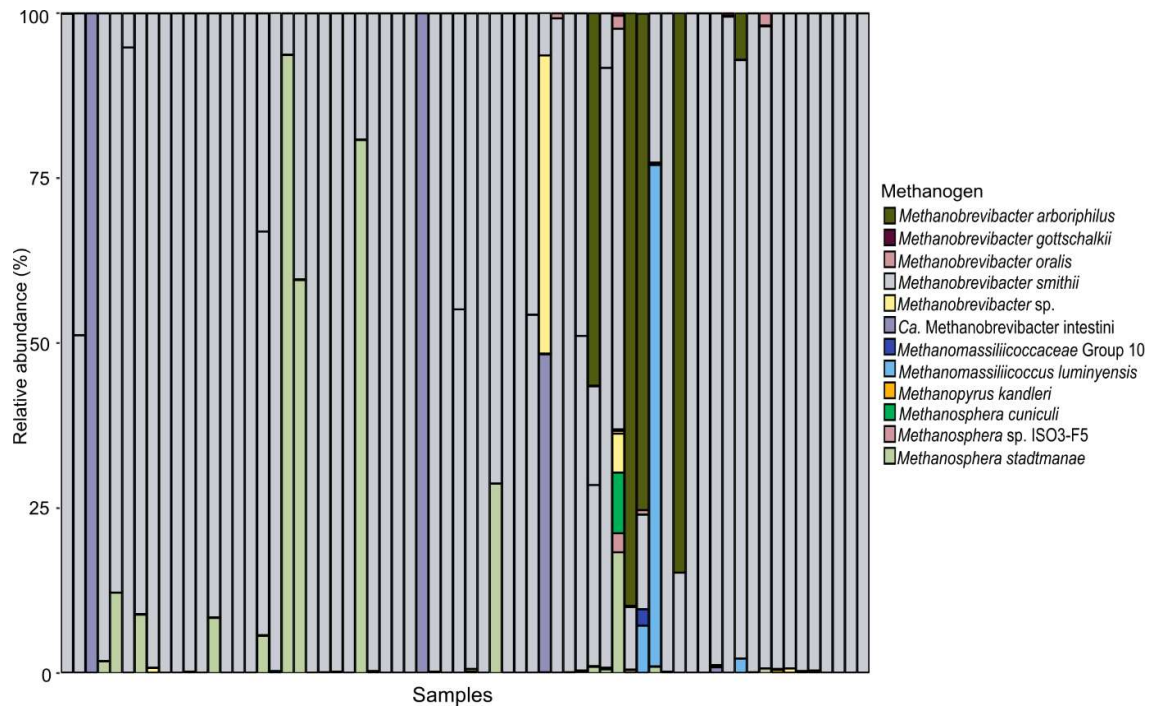

**FIG S2** A stacked barplot of methanogens in adult fecal samples ( $n=66$ ) based on 16S amplicon sequencing using Ar915F/Ar1386R primers. The samples are arranged from highest to lowest (left to right) 16S rRNA gene copies/ng of DNA. Sequences were BLAST against RIM-DB database clustered at 95% sequenced identity.

Table S1. Metadata for Singapore Platinum Metagenomes Project (SPMP).

| Sample ID | Sample Type | Nationality | Age | Gender | Race    |
|-----------|-------------|-------------|-----|--------|---------|
| SPMP1     | Stool       | Singaporean | 57  | M      | Indian  |
| SPMP2     | Stool       | Singaporean | 52  | F      | Indian  |
| SPMP3     | Stool       | Singaporean | 52  | F      | Indian  |
| SPMP4     | Stool       | Singaporean | 48  | M      | Indian  |
| SPMP5     | Stool       | Singaporean | 54  | F      | Malay   |
| SPMP6     | Stool       | Singaporean | 68  | M      | Malay   |
| SPMP7     | Stool       | Singaporean | 61  | F      | Malay   |
| SPMP8     | Stool       | Singaporean | 54  | M      | Malay   |
| SPMP9     | Stool       | Singaporean | 59  | M      | Indian  |
| SPMP10    | Stool       | Singaporean | 51  | F      | Malay   |
| SPMP11    | Stool       | Singaporean | 51  | M      | Indian  |
| SPMP12    | Stool       | Singaporean | 58  | F      | Malay   |
| SPMP13    | Stool       | Singaporean | 60  | F      | Malay   |
| SPMP14    | Stool       | Singaporean | 67  | F      | Indian  |
| SPMP15    | Stool       | Singaporean | 71  | F      | Malay   |
| SPMP16    | Stool       | Singaporean | 68  | F      | Indian  |
| SPMP17    | Stool       | Singaporean | 56  | F      | Malay   |
| SPMP18    | Stool       | Singaporean | 58  | F      | Chinese |
| SPMP19    | Stool       | Singaporean | 56  | F      | Chinese |
| SPMP20    | Stool       | Singaporean | 60  | F      | Chinese |
| SPMP21    | Stool       | Singaporean | 69  | F      | Chinese |
| SPMP22    | Stool       | Singaporean | 59  | F      | Chinese |
| SPMP23    | Stool       | Singaporean | 62  | F      | Indian  |
| SPMP24    | Stool       | Singaporean | 65  | F      | Indian  |
| SPMP25    | Stool       | Singaporean | 66  | M      | Indian  |
| SPMP26    | Stool       | Singaporean | 60  | M      | Indian  |
| SPMP27    | Stool       | Singaporean | 56  | F      | Chinese |
| SPMP28    | Stool       | Singaporean | 68  | M      | Indian  |
| SPMP29    | Stool       | Singaporean | 56  | F      | Indian  |
| SPMP30    | Stool       | Singaporean | 57  | M      | Chinese |
| SPMP31    | Stool       | Singaporean | 64  | M      | Chinese |
| SPMP32    | Stool       | Singaporean | 60  | F      | Indian  |
| SPMP33    | Stool       | Singaporean | 59  | M      | Chinese |
| SPMP34    | Stool       | Singaporean | 65  | M      | Chinese |
| SPMP35    | Stool       | Singaporean | 71  | F      | Indian  |
| SPMP36    | Stool       | Singaporean | 53  | M      | Chinese |
| SPMP37    | Stool       | Singaporean | 73  | M      | Chinese |
| SPMP38    | Stool       | Singaporean | 62  | F      | Indian  |
| SPMP39    | Stool       | Singaporean | 60  | F      | Chinese |
| SPMP40    | Stool       | Singaporean | 58  | F      | Chinese |
| SPMP41    | Stool       | Singaporean | 50  | M      | Indian  |
| SPMP42    | Stool       | Singaporean | 60  | F      | Chinese |
| SPMP43    | Stool       | Singaporean | 63  | M      | Chinese |
| SPMP44    | Stool       | Singaporean | 57  | F      | Chinese |
| SPMP45    | Stool       | Singaporean | 61  | F      | Indian  |
| SPMP46    | Stool       | Singaporean | 62  | F      | Chinese |
| SPMP47    | Stool       | Singaporean | 65  | F      | Indian  |
| SPMP48    | Stool       | Singaporean | 71  | F      | Malay   |
| SPMP49    | Stool       | Singaporean | 63  | F      | Chinese |
| SPMP50    | Stool       | Singaporean | 67  | M      | Chinese |
| SPMP51    | Stool       | Singaporean | 59  | M      | Indian  |
| SPMP52    | Stool       | Singaporean | 61  | F      | Chinese |
| SPMP53    | Stool       | Singaporean | 63  | F      | Chinese |
| SPMP54    | Stool       | Singaporean | 67  | F      | Chinese |
| SPMP55    | Stool       | Singaporean | 58  | F      | Chinese |
| SPMP56    | Stool       | Singaporean | 68  | F      | Chinese |
| SPMP57    | Stool       | Singaporean | 62  | M      | Chinese |
| SPMP58    | Stool       | Singaporean | 60  | F      | Chinese |
| SPMP59    | Stool       | Singaporean | 62  | F      | Chinese |
| SPMP60    | Stool       | Singaporean | 50  | M      | Malay   |
| SPMP61    | Stool       | Singaporean | 61  | M      | Chinese |
| SPMP62    | Stool       | Singaporean | 57  | F      | Malay   |
| SPMP63    | Stool       | Singaporean | 58  | F      | Chinese |
| SPMP64    | Stool       | Singaporean | 60  | M      | Malay   |
| SPMP65    | Stool       | Singaporean | 60  | M      | Chinese |
| SPMP66    | Stool       | Singaporean | 55  | F      | Chinese |
| SPMP67    | Stool       | Singaporean | 60  | F      | Chinese |
| SPMP68    | Stool       | Singaporean | 52  | M      | Malay   |
| SPMP69    | Stool       | Singaporean | 52  | F      | Malay   |
| SPMP70    | Stool       | Singaporean | 57  | M      | Malay   |
| SPMP71    | Stool       | Singaporean | 51  | F      | Malay   |
| SPMP72    | Stool       | Singaporean | 62  | F      | Indian  |
| SPMP73    | Stool       | Singaporean | 48  | F      | Malay   |
| SPMP74    | Stool       | Singaporean | 55  | M      | Chinese |
| SPMP75    | Stool       | Singaporean | 53  | M      | Chinese |
| SPMP76    | Stool       | Singaporean | 57  | M      | Malay   |
| SPMP77    | Stool       | Singaporean | 62  | M      | Chinese |
| SPMP78    | Stool       | Singaporean | 58  | F      | Malay   |
| SPMP79    | Stool       | Singaporean | 56  | F      | Malay   |
| SPMP80    | Stool       | Singaporean | 49  | F      | Malay   |
| SPMP81    | Stool       | Singaporean | 52  | F      | Indian  |
| SPMP82    | Stool       | Singaporean | 67  | M      | Indian  |
| SPMP83    | Stool       | Singaporean | 50  | M      | Malay   |
| SPMP84    | Stool       | Singaporean | 61  | M      | Chinese |
| SPMP85    | Stool       | Singaporean | 57  | F      | Chinese |
| SPMP86    | Stool       | Singaporean | 60  | F      | Malay   |
| SPMP87    | Stool       | Singaporean | 61  | F      | Chinese |
| SPMP88    | Stool       | Singaporean | 61  | F      | Chinese |
| SPMP89    | Stool       | Singaporean | 62  | F      | Indian  |
| SPMP90    | Stool       | Singaporean | 60  | F      | Chinese |
| SPMP91    | Stool       | Singaporean | 64  | F      | Chinese |
| SPMP92    | Stool       | Singaporean | 66  | F      | Malay   |
| SPMP93    | Stool       | Singaporean | 53  | M      | Indian  |
| SPMP94    | Stool       | Singaporean | 59  | M      | Chinese |
| SPMP95    | Stool       | Singaporean | 67  | M      | Chinese |
| SPMP96    | Stool       | Singaporean | 74  | F      | Chinese |
| SPMP97    | Stool       | Singaporean | 54  | M      | Malay   |
| SPMP98    | Stool       | Singaporean | 54  | M      | Chinese |
| SPMP99    | Stool       | Singaporean | 60  | M      | Chinese |
| SPMP100   | Stool       | Singaporean | 59  | F      | Chinese |
| SPMP101   | Stool       | Singaporean | 60  | M      | Chinese |
| SPMP102   | Stool       | Singaporean | 56  | F      | Chinese |
| SPMP103   | Stool       | Singaporean | 62  | M      | Indian  |
| SPMP104   | Stool       | Singaporean | 57  | F      | Indian  |
| SPMP105   | Stool       | Singaporean | 59  | M      | Chinese |
| SPMP106   | Stool       | Singaporean | 56  | F      | Chinese |
| SPMP107   | Stool       | Singaporean | 76  | M      | Chinese |
| SPMP108   | Stool       | Singaporean | 49  | M      | Indian  |
| SPMP109   | Stool       | Singaporean | 66  | F      | Indian  |

**Table S2. Metagenomic assembled genome (MAG) statistics and quality.**

| MAG Sample ID   | Species                        | Size (bp) | #_contigs | Contig_N50 | Longest_contig | Completeness | Contamination | Species Level Cluster (SLC) | MIMAG (NC: Near complete) |
|-----------------|--------------------------------|-----------|-----------|------------|----------------|--------------|---------------|-----------------------------|---------------------------|
| SPMP03_bin.52   | Methanobrevibacter_A smithii   | 1377976   | 69        | 31168      | 125079         | 56.29        | 0.31          | 159                         | MEDIUM                    |
| SPMP04_bin.116  | Methanobrevibacter_A smithii   | 1601359   | 46        | 72088      | 140159         | 79.73        | 0             | 159                         | MEDIUM                    |
| SPMP05_bin.17   | Methanobrevibacter_A smithii   | 1833101   | 2         | 1763845    | 1763845        | 99.2         | 1.6           | 159                         | NC                        |
| SPMP05_bin.41   | Methanosphaera stadtmanae      | 1699540   | 27        | 96629      | 279033         | 86.14        | 0.8           | 416                         | MEDIUM                    |
| SPMP13_bin.9    | Methanobrevibacter_A smithii   | 1792840   | 3         | 1782837    | 1782837        | 98           | 0.8           | 159                         | NC                        |
| SPMP18_bin.5    | Methanobrevibacter_A smithii   | 1801357   | 2         | 1278871    | 1278871        | 99.2         | 0             | 159                         | NC                        |
| SPMP25_bin.80   | Methanobrevibacter_A smithii   | 1635828   | 35        | 88240      | 299168         | 83.39        | 0             | 159                         | MEDIUM                    |
| SPMP26_bin.4    | Methanosphaera stadtmanae      | 1692852   | 4         | 641713     | 681328         | 96.8         | 0             | 416                         | HIGH                      |
| SPMP26_bin.8    | Methanobrevibacter_A smithii   | 1763862   | 5         | 1009593    | 1009593        | 99.16        | 0             | 159                         | NC                        |
| SPMP30_bin.136  | Methanobrevibacter_A smithii   | 2798878   | 103       | 1758261    | 1758261        | 100          | 0             | 159                         | NC                        |
| SPMP30_bin.148  | Methanosphaera stadtmanae      | 1468228   | 59        | 68092      | 159469         | 77.81        | 2.4           | 416                         | MEDIUM                    |
| SPMP31_bin.129  | Methanobrevibacter_A smithii   | 1853786   | 2         | 1787433    | 1787433        | 100          | 0             | 159                         | NC                        |
| SPMP31_bin.71   | Methanosphaera stadtmanae      | 1488493   | 19        | 122109     | 266271         | 75.81        | 0             | 416                         | MEDIUM                    |
| SPMP39_bin.88   | Methanobrevibacter_A smithii_A | 1229812   | 78        | 24837      | 64848          | 57.58        | 0             | 84                          | MEDIUM                    |
| SPMP48_bin.130  | Methanobrevibacter_A smithii_A | 1901350   | 3         | 1639946    | 1639946        | 97.14        | 0.8           | 84                          | NC                        |
| SPMP51_bin.133  | Methanobrevibacter_A smithii   | 1750191   | 4         | 942232     | 942232         | 97.6         | 0             | 159                         | NC                        |
| SPMP88_bin.19   | Methanobrevibacter_A smithii   | 1846791   | 135       | 29285      | 83533          | 90.57        | 0.8           | 159                         | NC                        |
| SPMP102_bin.110 | Methanosphaera stadtmanae      | 1830480   | 9         | 451050     | 720204         | 96.8         | 0             | 416                         | HIGH                      |
| SPMP102_bin.4   | Methanobrevibacter_A smithii   | 1744806   | 7         | 246028     | 697833         | 99.2         | 0             | 159                         | NC                        |

Table S3A. Nucleotide differences between 16S rRNA genes of *Methanobrevibacter smithii* DSM 861<sup>T</sup> and Candidatus *Methanobrevibacter intestini* (SPMP48)

|                                                                                                      | 72 <sup>*a</sup> | 268 <sup>b</sup> | 376 <sup>b</sup> | 451 <sup>c</sup> | 1056 <sup>d</sup> | 1080 <sup>d</sup> | 1081 <sup>d</sup> | 1394 <sup>e</sup> |
|------------------------------------------------------------------------------------------------------|------------------|------------------|------------------|------------------|-------------------|-------------------|-------------------|-------------------|
| <i>Methanobrevibacter smithii</i> DSM 861 <sup>T</sup> (GenBank accession number NC_009515; 1478 bp) | G                | C                | G                | C                | T                 | T                 | T                 | T                 |
| SPMP48 (MAG; 1475 bp)                                                                                | A                | T/C <sup>^</sup> | -                | T                | C                 | -                 | -                 | G                 |

\*Positions are based on the 16S rRNA gene of *M. smithii* DSM 861<sup>T</sup> (GenBank accession number NC\_009515).

<sup>a</sup>V1 region, <sup>b</sup>V3 region, <sup>c</sup>V4 region, <sup>d</sup>V7 region, <sup>e</sup>V9 region

<sup>^</sup>Cytosine was obtained from Sangar sequencing

Table S3B. Nucleotide differences between 16S rRNA genes of *Methanobrevibacter smithii* WWM1085 and *Methanobrevibacter* sp. TLL-48-HuF1.

|                                                  | 268 <sup>*a</sup> | 451 <sup>b</sup> | 1074 <sup>c</sup> |
|--------------------------------------------------|-------------------|------------------|-------------------|
| TLL-48-HuF1 (NCBI CP081485; 1475 bp)             | T/C <sup>^</sup>  | T                | C                 |
| WWM1085 (NCBI RefSeq NZ_NQLD01000012.1; 1475 bp) | C                 | C                | T/C               |

\*Positions are based on the 16S rRNA gene of *M. smithii* DSM 861<sup>T</sup> (GenBank accession NC\_009515).

<sup>a</sup>V3 region, <sup>b</sup>V4 region, <sup>c</sup>V7 region

<sup>^</sup>Cytosine was obtained from Sangar sequencing

Table S4. Average nucleotide identity (%) of Methanobrevibacter species.

|                                                    | <i>M. arboriphilus</i> DSM 1125 | <i>M. boviskoreani</i> DSM 25824 | <i>M. curvatus</i> DSM 11111 | <i>M. cuticularis</i> DSM 11139 | <i>M. gottschalkii</i> DSM 11977 | <i>M. millerae</i> DSM 16643 | <i>M. olleyae</i> DSM 16632 | <i>M. oralis</i> DSM 7256 | <i>M. ruminantium</i> DSM 1093 | <i>M. smithii</i> DSM 861 | Candidatus<br>Methanobrevibacter<br>intestinalis WWM1085 | <i>M. thaueri</i> DSM 11995 | <i>M. woesei</i> DSM 11979 |
|----------------------------------------------------|---------------------------------|----------------------------------|------------------------------|---------------------------------|----------------------------------|------------------------------|-----------------------------|---------------------------|--------------------------------|---------------------------|----------------------------------------------------------|-----------------------------|----------------------------|
| <i>M. arboriphilus</i> DSM 1125                    |                                 |                                  |                              |                                 |                                  |                              |                             |                           |                                |                           |                                                          |                             |                            |
| <i>M. boviskoreani</i> DSM 25824                   | <75                             |                                  |                              |                                 |                                  |                              |                             |                           |                                |                           |                                                          |                             |                            |
| <i>M. curvatus</i> DSM 11111                       | 76.3                            | <75                              |                              |                                 |                                  |                              |                             |                           |                                |                           |                                                          |                             |                            |
| <i>M. cuticularis</i> DSM 11139                    | 78.3                            | <75                              | 77.0                         |                                 |                                  |                              |                             |                           |                                |                           |                                                          |                             |                            |
| <i>M. gottschalkii</i> DSM 11977                   | 76.2                            | <75                              | <75                          | <75                             |                                  |                              |                             |                           |                                |                           |                                                          |                             |                            |
| <i>M. millerae</i> DSM 16643                       | <75                             | <75                              | <75                          | <75                             | 79                               |                              |                             |                           |                                |                           |                                                          |                             |                            |
| <i>M. olleyae</i> DSM 16632                        | 76.9                            | 76.7                             | 75.8                         | 76.1                            | 77.9                             | <75                          |                             |                           |                                |                           |                                                          |                             |                            |
| <i>M. oralis</i> DSM 7256                          | 76.9                            | <75                              | <75                          | <75                             | 80.1                             | 78.4                         | 77.1                        |                           |                                |                           |                                                          |                             |                            |
| <i>M. ruminantium</i> DSM 1093                     | <75                             | <75                              | <75                          | <75                             | <75                              | <75                          | 79.9                        | <75                       |                                |                           |                                                          |                             |                            |
| <i>M. smithii</i> DSM 861                          | 76.4                            | <75                              | <75                          | <75                             | 79.6                             | 78.9                         | 77.2                        | 79.6                      | <75                            |                           |                                                          |                             |                            |
| Candidatus Methanobrevibacter intestinalis WWM1085 | <75                             | <75                              | <75                          | 76.3                            | 79.6                             | 79.0                         | 77.5                        | 79.6                      | <75                            | 93.6                      |                                                          |                             |                            |
| <i>M. thaueri</i> DSM 11995                        | <75                             | <75                              | <75                          | <75                             | 80.4                             | 79.5                         | <75                         | 78.4                      | <75                            | 79.3                      | 79.4                                                     |                             |                            |
| <i>M. woesei</i> DSM 11979                         | 76.7                            | 77.9                             | 76.3                         | 77.0                            | 78.9                             | <75                          | 77.8                        | 79.1                      | <75                            | 80.2                      | 80.4                                                     | 79.1                        |                            |
| Methanobrevibacter sp. TLL-4844uF1                 | 76.6                            | <75                              | <75                          | 76.3                            | 78.4                             | 78.9                         | 77.4                        | 79.7                      | <75                            | 93.7                      | 98.4                                                     | 79.4                        | 80.2                       |

Table S5. Genome features of *Methanobrevibacter smithii* DSM 861<sup>T</sup>, strains TLL-48-HuF1 and WWM1085.

|                                                                                           | TLL-48-HuF1<br>(CP081485) | <i>M. smithii</i> DSM 861 <sup>T</sup><br>(CP000678) | <i>Candidatus</i><br><i>Methanobrevibacter</i><br><i>intestini</i> WWM1085<br>(SAMN07492084) |
|-------------------------------------------------------------------------------------------|---------------------------|------------------------------------------------------|----------------------------------------------------------------------------------------------|
| Last annotation date on NCBI using the NCBI Prokaryotic Genome Annotation Pipeline (PGAP) | 19-Aug-21                 | 5-Jan-22                                             | 19-Jun-21                                                                                    |
| Total genome length (bp)                                                                  | 1,951,395                 | 1,853,160                                            | 1,926,345                                                                                    |
| DNA GC content (bp)                                                                       | 592,204                   | 575,114                                              | 543,228                                                                                      |
| GC(%)                                                                                     | 30.35%                    | 31.03%                                               | 30.30%                                                                                       |
| Total genes                                                                               | 1,840                     | 1,804                                                | 1,852                                                                                        |
| 5S rRNA gene                                                                              | 3                         | 3                                                    | 3                                                                                            |
| 16S rRNA gene                                                                             | 2                         | 2                                                    | 3 <sup>^</sup>                                                                               |
| LSU rRNA genes                                                                            | 2                         | 2                                                    | 3 <sup>^</sup>                                                                               |
| tRNA genes                                                                                | 35                        | 36                                                   | 35                                                                                           |
| non-coding RNAs                                                                           | 2                         | 2                                                    | 2                                                                                            |
| CRISPR array                                                                              | 0                         | 1                                                    | 2                                                                                            |
| Total protein coding sequence (CDS)                                                       | 1,777                     | 1,759                                                | 1,753                                                                                        |
| Pseudogenes                                                                               | 40                        | 22                                                   | 53                                                                                           |
| <i>mcrA</i> gene (type)                                                                   | 1 (McrA I)                | 2 (McrA I and McrA II)                               | 1 (McrA I)                                                                                   |

<sup>^</sup>Two of which are partial genes.



**Table S6. SwissProt annotation of unique proteins based on pairwise comparison of TLL-48-HuF1 to other genomes. (Unannotated proteins are not shown)**

| No.                                                          | swiss_prot_id | Gene      | Protein                                                            |
|--------------------------------------------------------------|---------------|-----------|--------------------------------------------------------------------|
| <b>Proteins unique to TLL-48-HuF1 vs DSM 861<sup>T</sup></b> |               |           |                                                                    |
| 1                                                            | B0NAQ4        | baiN      | 3-dehydro-bile acid delta(4,6)-reductase                           |
| 2                                                            | Q2NB77        | ELI_04860 | Blue-light-activated histidine kinase 2                            |
| 3                                                            | P20021        | cadA      | Cadmium-transporting ATPase                                        |
| 4                                                            | Q1RKM3        | pgsA      | CDP-diacylglycerol--glycerol-3-phosphate 3-phosphatidyltransferase |
| 5                                                            | Q10717        | CCP2      | Cysteine proteinase 2                                              |
| 6                                                            | P9WJW8        | jefA      | Drug efflux pump JefA                                              |
| 7                                                            | P25148        | gspA      | General stress protein A                                           |
| 8                                                            | B2THR0        | gpsA      | Glycerol-3-phosphate dehydrogenase [NAD(P)+]                       |
| 9                                                            | Q8XGT8        | gdx       | Guanidinium exporter                                               |
| 10                                                           | Q57603        | mvp       | Hyperpolarization-activated voltage-gated potassium channel        |
| 11                                                           | P34877        | scrFIAM   | Modification methylase ScrFIA                                      |
| 12                                                           | P9WGL4        | pdtaS     | Probable sensor histidine kinase PdtaS                             |
| 13                                                           | P9WGM2        | pdtaR     | Probable transcriptional regulatory protein PdtaR                  |
| 14                                                           | Q9JWD6        | vsr       | Putative very short patch repair endonuclease                      |
| 15                                                           | O31423        | skfB      | Sporulation killing factor maturation protein SkfB                 |
| 16                                                           | O59151        | tfb       | Transcription initiation factor IIB                                |
| 17                                                           | P10484        | hsdM      | Type I restriction enzyme EcoR124II M protein                      |
| 18                                                           | Q57594        | MJ0130    | Type-1 restriction enzyme MjaXIP specificity protein               |
| 19                                                           | Q5HK76        | hsdR      | Type-1 restriction enzyme R protein                                |
| 20                                                           | P36433        | hpallR    | Type-2 restriction enzyme HpaII                                    |
| 21                                                           | Q4L5V4        | Q4L5V4    | Tyrosine recombinase XerC                                          |
| <b>Proteins unique to TLL-48-HuF1 vs WWM1085</b>             |               |           |                                                                    |
| 1                                                            | B0NAQ4        | baiN      | 3-dehydro-bile acid delta(4,6)-reductase                           |
| 2                                                            | Q2NB77        | ELI_04860 | Blue-light-activated histidine kinase 2                            |
| 3                                                            | Q8TXF9        | albA1     | DNA/RNA-binding protein Alba 1                                     |
| 4                                                            | Q00405        | vhcD      | F420-non-reducing hydrogenase vhc iron-sulfur subunit D            |
| 5                                                            | Q60316        | fdhB      | Formate dehydrogenase subunit beta                                 |
| 6                                                            | P26162        | bchH      | Magnesium-chelatase subunit H                                      |
| 7                                                            | P34877        | scrFIAM   | Modification methylase ScrFIA                                      |
| 8                                                            | P60232        | mvhB      | Polyferredoxin protein MvhB                                        |
| 9                                                            | P9WGL4        | pdtaS     | Probable sensor histidine kinase PdtaS                             |
| 10                                                           | P9WGM2        | pdtaR     | Probable transcriptional regulatory protein PdtaR                  |
| 11                                                           | Q9JWD6        | vsr       | Putative very short patch repair endonuclease                      |
| 12                                                           | O31423        | skfB      | Sporulation killing factor maturation protein SkfB                 |
| 13                                                           | P10484        | hsdM      | Type I restriction enzyme EcoR124II M protein                      |
| 14                                                           | Q57594        | MJ0130    | Type-1 restriction enzyme MjaXIP specificity protein               |
| 15                                                           | Q57594        | MJ0130    | Type-1 restriction enzyme MjaXIP specificity protein               |
| 16                                                           | Q5HK76        | hsdR      | Type-1 restriction enzyme R protein                                |
| 17                                                           | P36433        | hpallR    | Type-2 restriction enzyme HpaII                                    |
| <b>Proteins unique to DSM861<sup>T</sup> vs TLL-48-HuF1</b>  |               |           |                                                                    |
| 1                                                            | Q57831        | cas2      | CRISPR-associated endoribonuclease Cas2                            |
| 2                                                            | O58931        | cas6      | CRISPR-associated endoribonuclease Cas6                            |
| 3                                                            | Q57822        | cas4      | CRISPR-associated exonuclease Cas4                                 |
| 4                                                            | D3E288        | cas1-1    | CRISPR-associated protein Cas1 1                                   |
| <b>Proteins unique to WWM1085 vs TLL48HuF1</b>               |               |           |                                                                    |
| 1                                                            | P27373        | slgA      | Cell surface glycoprotein                                          |
| 2                                                            | Q57831        | cas2      | CRISPR-associated endoribonuclease Cas2                            |
| 3                                                            | O58931        | cas6      | CRISPR-associated endoribonuclease Cas6                            |
| 4                                                            | Q57822        | cas4      | CRISPR-associated exonuclease Cas4                                 |
| 5                                                            | D3E288        | cas1-1    | CRISPR-associated protein Cas1 1                                   |

**Table S7. KEGG annotation of unique proteins based on pairwise comparison of TLL-48-HuF1 to other strains. (Unannotated proteins are not shown)**

| No                                                                                                                                      | KEGG ID | Gene              | KO Description                                                            |
|-----------------------------------------------------------------------------------------------------------------------------------------|---------|-------------------|---------------------------------------------------------------------------|
| <b>Proteins unique to TLL-48-HuF1 vs DSM 861<sup>T</sup> (Proteins in blue are also not found in TLL-48 (MAG) and WWM1085 genomes)</b>  |         |                   |                                                                           |
| 1                                                                                                                                       | K22010  | pdtaR             | two-component system, response regulator PdtA                             |
| 2                                                                                                                                       | K01154  | hsdS              | type I restriction enzyme, S subunit [EC:3.1.21.3]                        |
| 3                                                                                                                                       | K03427  | hsdM              | type I restriction enzyme M protein [EC:2.1.1.72]                         |
| 4                                                                                                                                       | K01153  | hsdR              | type I restriction enzyme, R subunit [EC:3.1.21.3]                        |
| 5                                                                                                                                       | K00558  | DNMT1, dcm        | DNA (cytosine-5)-methyltransferase 1 [EC:2.1.1.37]                        |
| 6                                                                                                                                       | K07458  | vsr               | DNA mismatch endonuclease, patch repair protein [EC:3.1.-.-]              |
| 7                                                                                                                                       | K07133  | K07133            | uncharacterized protein                                                   |
| 8                                                                                                                                       | K02107  | ATPVG, ahaH, atpH | V/A-type H <sup>+</sup> /Na <sup>+</sup> -transporting ATPase subunit G/H |
| 9                                                                                                                                       | K02472  | wecC              | UDP-N-acetyl-D-mannosaminuronic acid dehydrogenase [EC:1.1.1.336]         |
| 10                                                                                                                                      | K07133  | K07133            | uncharacterized protein                                                   |
| <b>Proteins unique to TLL-48-HuF1 vs WWM1085</b>                                                                                        |         |                   |                                                                           |
| 1                                                                                                                                       | K22010  | pdtaR             | two-component system, response regulator PdtA                             |
| 2                                                                                                                                       | K01154  | hsdS              | type I restriction enzyme, S subunit [EC:3.1.21.3]                        |
| 3                                                                                                                                       | K03427  | hsdM              | type I restriction enzyme M protein [EC:2.1.1.72]                         |
| 4                                                                                                                                       | K01153  | hsdR              | type I restriction enzyme, R subunit [EC:3.1.21.3]                        |
| 5                                                                                                                                       | K00558  | DNMT1, dcm        | DNA (cytosine-5)-methyltransferase 1 [EC:2.1.1.37]                        |
| 6                                                                                                                                       | K07458  | vsr               | DNA mismatch endonuclease, patch repair protein [EC:3.1.-.-]              |
| 7                                                                                                                                       | K07133  | K07133            | uncharacterized protein                                                   |
| <b>Proteins unique to SPMP-48 (MAG) vs TLL-48-HuF1 (Proteins in blue are also not found in DSM 861<sup>T</sup> and WWM1085 genomes)</b> |         |                   |                                                                           |
| 1                                                                                                                                       | K00077  | panE, apbA        | 2-dehydropantoate 2-reductase [EC:1.1.1.169]                              |
| 2                                                                                                                                       | K02107  | ATPVG, ahaH, atpH | V/A-type H <sup>+</sup> /Na <sup>+</sup> -transporting ATPase subunit G/H |
| <b>Proteins unique to DSM 861<sup>T</sup> vs TLL-48-HuF1 (Proteins in blue are also not found in TLL-48 (MAG) and WWM1085 genomes)</b>  |         |                   |                                                                           |
| 1                                                                                                                                       | K07133  | K07133            | uncharacterized protein                                                   |
| 2                                                                                                                                       | K09951  | cas2              | CRISPR-associated protein Cas2                                            |
| 3                                                                                                                                       | K15342  | cas1              | CRISP-associated protein Cas1                                             |
| 4                                                                                                                                       | K07464  | cas4              | CRISPR-associated exonuclease Cas4 [EC:3.1.12.1]                          |
| 5                                                                                                                                       | K19091  | cas6              | CRISPR-associated endoribonuclease Cas6 [EC:3.1.-.-]                      |
| 6                                                                                                                                       | K01338  | lon               | ATP-dependent Lon protease [EC:3.4.21.53]                                 |
| 7                                                                                                                                       | K07012  | cas3              | CRISPR-associated endonuclease/helicase Cas3 [EC:3.1.-.- 3.6.4.-]         |
| 8                                                                                                                                       | K19090  | cas5t             | CRISPR-associated protein Cas5t                                           |
| 9                                                                                                                                       | K19088  | cst1, cas8a       | CRISPR-associated protein Cst1                                            |
| 10                                                                                                                                      | K19075  | cst2, cas7        | CRISPR-associated protein Cst2                                            |
| 11                                                                                                                                      | K04096  | smf               | DNA processing protein                                                    |
| 12                                                                                                                                      | K19171  | dndD              | DNA sulfur modification protein DndD                                      |
| 13                                                                                                                                      | K00399  | mcrA              | methyl-coenzyme M reductase alpha subunit [EC:2.8.4.1]                    |
| 14                                                                                                                                      | K00401  | mcrB              | methyl-coenzyme M reductase beta subunit [EC:2.8.4.1]                     |
| 15                                                                                                                                      | K00402  | mcrG              | methyl-coenzyme M reductase gamma subunit [EC:2.8.4.1]                    |
| 16                                                                                                                                      | K03422  | mcrD              | methyl-coenzyme M reductase subunit D                                     |
| 17                                                                                                                                      | K02017  | modC              | molybdate transport system ATP-binding protein [EC:7.3.2.5]               |
| 18                                                                                                                                      | K02018  | modB              | molybdate transport system permease protein                               |
| 19                                                                                                                                      | K02020  | modA              | molybdate transport system substrate-binding protein                      |
| 20                                                                                                                                      | K03057  | tfs               | transcription factor S                                                    |
| 21                                                                                                                                      | K00012  | UGDH, ugd         | UDPglucose 6-dehydrogenase [EC:1.1.1.22]                                  |
| 22                                                                                                                                      | K06944  | K06944            | uncharacterized protein                                                   |
| 23                                                                                                                                      | K07133  | K07133            | uncharacterized protein                                                   |
| 24                                                                                                                                      | K07133  | K07133            | uncharacterized protein                                                   |
| <b>Proteins unique to WWM1085 vs TLL-48-HuF1 (Proteins in blue are also not found in TLL-48 (MAG) and DSM 861<sup>T</sup> genomes)</b>  |         |                   |                                                                           |
| 1                                                                                                                                       | K09951  | cas2              | CRISPR-associated protein Cas2                                            |
| 2                                                                                                                                       | K15342  | cas1              | CRISP-associated protein Cas1                                             |
| 3                                                                                                                                       | K07464  | cas4              | CRISPR-associated exonuclease Cas4 [EC:3.1.12.1]                          |
| 4                                                                                                                                       | K19091  | cas6              | CRISPR-associated endoribonuclease Cas6 [EC:3.1.-.-]                      |
| 5                                                                                                                                       | K07133  | K07133            | uncharacterized protein                                                   |
| 6                                                                                                                                       | K06921  | K06921            | uncharacterized protein                                                   |
| 7                                                                                                                                       | K06921  | K06921            | uncharacterized protein                                                   |
| 8                                                                                                                                       | K15342  | cas1              | CRISP-associated protein Cas1                                             |
| 9                                                                                                                                       | K07012  | cas3              | CRISPR-associated endonuclease/helicase Cas3 [EC:3.1.-.- 3.6.4.-]         |
| 10                                                                                                                                      | K09951  | cas2              | CRISPR-associated protein Cas2                                            |
| 11                                                                                                                                      | K19116  | cas5h             | CRISPR-associated protein Cas5h                                           |
| 12                                                                                                                                      | K19114  | csh1              | CRISPR-associated protein Csh1                                            |
| 13                                                                                                                                      | K19115  | csh2              | CRISPR-associated protein Csh2                                            |
| 14                                                                                                                                      | K07016  | csm1, cas10       | CRISPR-associated protein Csm1                                            |
| 15                                                                                                                                      | K19138  | csm2              | CRISPR-associated protein Csm2                                            |
| 16                                                                                                                                      | K09002  | csm3              | CRISPR-associated protein Csm3                                            |
| 17                                                                                                                                      | K19139  | csm4              | CRISPR-associated protein Csm4                                            |
| 18                                                                                                                                      | K19140  | csm5              | CRISPR-associated protein Csm5                                            |
| 19                                                                                                                                      | K19173  | dptF              | DNA phosphorothioation-dependent restriction protein DptF                 |
| 20                                                                                                                                      | K19174  | dptG              | DNA phosphorothioation-dependent restriction protein DptG                 |
| 21                                                                                                                                      | K19175  | dptH              | DNA phosphorothioation-dependent restriction protein DptH                 |
| 22                                                                                                                                      | K17686  | copA, ctpA, ATP7  | P-type Cu <sup>+</sup> transporter [EC:7.2.2.8]                           |
| 23                                                                                                                                      | K03427  | hsdM              | type I restriction enzyme M protein [EC:2.1.1.72]                         |
| 24                                                                                                                                      | K01153  | hsdR              | type I restriction enzyme, R subunit [EC:3.1.21.3]                        |
| 25                                                                                                                                      | K07133  | K07133            | uncharacterized protein                                                   |
| 26                                                                                                                                      | K02107  | ATPVG, ahaH, atpH | V/A-type H <sup>+</sup> /Na <sup>+</sup> -transporting ATPase subunit G/H |

Table S8. Physiological characteristics of strain TLL-48-HuF1 and *Methanobrevibacter smithii* type strains and other human gut strains

|                                                                                  |                | TLL-48-HuF1                                          | <i>Methanobrevibacter smithii</i>                           |
|----------------------------------------------------------------------------------|----------------|------------------------------------------------------|-------------------------------------------------------------|
| Short rod length                                                                 |                | 1.14 ± 0.4 μm (SD., n=100 cells)                     | 0.99 ± 0.28 μm (SD, n=100 cells) <sup>a</sup>               |
|                                                                                  |                | Mean OD <sub>600</sub> (± SD., n=triplicate cultres) | (+) Growth or (-) no growth reported in Millet et al (1982) |
| H <sub>2</sub> :CO <sub>2</sub> (80:20)                                          | Formate        | 0.617 ± 0.045 <sup>*b</sup>                          | +                                                           |
|                                                                                  | Acetate        | 0.837 ± 0.023 <sup>*b</sup>                          | +                                                           |
|                                                                                  | Methanol       | 0.458 ± 0.021 <sup>*c</sup>                          | 0.37 ± 0.021 <sup>*ac</sup>                                 |
|                                                                                  | Trimethylamine | 0.254 ± 0.022 <sup>*c</sup>                          | 0.315 ± 0.035 <sup>*ac</sup>                                |
| N <sub>2</sub> :CO <sub>2</sub> (80:20)/ Ar:CO <sub>2</sub> (50:50) <sup>^</sup> | Formate        | 0.063 ± 0.019 <sup>b</sup>                           | -                                                           |
|                                                                                  | Acetate        | 0.007 ± 0.009 <sup>b</sup>                           | -                                                           |
|                                                                                  | Methanol       | 0.042 ± 0.008 <sup>c</sup>                           | 0.003 ± 0.001 <sup>ac</sup>                                 |
|                                                                                  | Trimethylamine | 0.024 ± 0.006 <sup>c</sup>                           | 0.032 ± 0.003 <sup>ac</sup>                                 |

<sup>a</sup> *Methanobrevibacter smithii* DSM 861<sup>T</sup> performed by this study

<sup>b</sup> 3 days incubation

<sup>c</sup> 5 days incubation

\*methane concentration was significantly higher (p<0.05; unpaired t-test) than the respective N<sub>2</sub>:CO<sub>2</sub> cultures

<sup>^</sup>Gas mixture used in Miller et al (1982)

Miller, T. L., Wolin, M. J., de Macario, E. C., & Macario, A. (1982). Isolation of *Methanobrevibacter smithii* from human feces. Applied and environmental microbiology, 43(1), 227-232.

Table S9. Primers sequences, amplicon size and annealing temperature used in the study.

| Target gene             | Primer name*           | Sequence (5'-3')           | Ta (°C) | Amplicon size (bp) | Reference              |
|-------------------------|------------------------|----------------------------|---------|--------------------|------------------------|
| Bacterial 16S rRNA gene | 27F                    | AGA GTT TGA TCM TGG CTC AG | 55      | ~1400              | Lane (1991)            |
|                         | 1492R                  | GGY TAC CTT GTT ACG ACT T  |         |                    | Loy et al (2005)       |
|                         | Ar84F                  | GCT CAG TAA CAC GTG GAT AA |         |                    | This study             |
| Methanogen 16S rRNA     | Ar915F                 | AGG AAT TGG CGG GGG AGC AC | 59      | ~471               | Watanabe et al. (2004) |
|                         | Ar1386R                | GCG GTG TGT GCA AGG AGC    | -       | -                  | Skillman et al. (2004) |
|                         | TLL48-mcrA-870F        | TCA AGG TTC CAG AGT TTA CC | 55      | 380                | This study             |
| TLL48-mcrA-1250R        | GCG AAT GCA GTA GAT GC |                            |         |                    |                        |
| mcrA                    | mcrA-85F               | GGC GGT TGG AAA CAA TCT G  | 59      | 1564               | This study             |
|                         | mcrA-1649R             | GCT GGG GTG ATG ACA GTT C  |         |                    |                        |

Lane, D.J. 1991. 16S/23S rRNA Sequencing. In: Stackebrandt, E. and Goodfellow, M., Eds. Nucleic Acid Techniques in Bacterial Systematic, John Wiley and Sons, New York, 115-175.

Loy A, Schulz C, Luoker S, Schöpfer-Wendels A, Stoecker K, Baranyi C, Lehner A, Wagner M. 2005. 16S rRNA gene-based oligonucleotide microarray for environmental monitoring of the betaproteobacterial order "Rhodocyclales". Appl Environ Microbiol 71(3):1373-86.

Watanabe T, Asakawa S, Nakamura A, Nagaoka K, Kimura M. 2004. DGGE method for analyzing 16S rDNA of methanogenic archaeal community in paddy field soil. FEMS Microbiol Lett 232: 153-163.

Skillman LC, Evans PN, Naylor GE, Morvan B, Jarvis GN, et al. 2004. 16S ribosomal DNA-directed PCR primers for ruminal methanogens and identification of methanogens colonising young lambs. Anaerobe 10: 277-285.

Table S10. Hybrid sequencing statistics for strain TLL-48-HuF1

|                                                    |           |
|----------------------------------------------------|-----------|
| Minlon reads generated                             | 51.38K    |
| N50                                                | 11.1kb    |
| Estimated bases                                    | 406.92 Mb |
| sequencing depth (TLL-48-HuF1 genome size 1.95 Mb) | 208 ×     |
| Illumina short reads                               | 8,160,838 |
| Effective                                          | 99.93%    |
| Sequencing depth (TLL-48-HuF1 genome size 1.95 Mb) | 627 ×     |
| Unicycler: No. of contigs                          | 1         |
